# Supplementary material
Source: publisher figshare collection journal article supplement (https://acs.figshare.com/ndownloader/files/3697843)

## **Supporting Information**

# **Hydrophobic blocks facilitate lipid compatibility and translocon recognition of transmembrane protein sequences**

**Tracy A. Stone<sup>a,b</sup>, Nina Schiller<sup>c,d</sup>, Gunnar von Heijne<sup>c,d</sup>,**

**and Charles M. Deber<sup>a,b,\*</sup>**

<sup>a</sup>Division of Molecular Structure & Function, Research Institute, Hospital for Sick Children, Toronto M5G 0A4; and <sup>b</sup>Department of Biochemistry, University of Toronto, Toronto M5S 1A8, Ontario, Canada.

<sup>c</sup>Center for Biomembrane Research, Department of Biochemistry and Biophysics, Stockholm University, SE-106 91 Stockholm, Sweden; and <sup>d</sup>Science for Life Laboratory, Stockholm University, Box 1031, SE-171 21 Solna, Sweden

\*Address correspondence to: Charles M. Deber, Division of Molecular Structure & Function, Research Institute, Hospital for Sick Children, Peter Gilgan Center for Research and Learning, 686 Bay Street, Toronto, Ontario, Canada M5G 0A4. Tel. (01) 416 813-5924; Fax (01) 416 813-5005; E-mail: [deber@sickkids.ca](mailto:deber@sickkids.ca).

**Table S1: Ser-Leu peptide % gel-shift, tryptophan fluorescence and helicity in SDS****micelles**

\*Calculated % peptide gel-shift from SDS-PAGE migration rates. SL<sub>amp</sub>, SL<sub>scr1</sub>, SL<sub>scr2</sub> all travelled significantly faster than the Leu-block peptides ( $p < 0.01$ ). Within the Leu-block series, S3L9 is the slowest traveling ( $p < 0.01$ ). S5L9 travels significantly faster than S3L9, S2L9 and S1L9 ( $p < 0.05$ ) but not S0L9, S9L9. Error values are reported as standard deviation.

†Tryptophan blue shifts were obtained from subtracting the maximum emission peak in SDS from the emission of free Trp in aqueous solution (350 nm). For the majority of peptides, significant differences are found in their blue shifts ( $p < 0.05$ ) with the exception of SL<sub>amp</sub> and S0L9, SL<sub>scr2</sub>; S0L9 and S9L9; SL<sub>scr2</sub>, S9L9 and S5L9; S1L9 and S2L9; S2L9 and SL<sub>scr1</sub>. Error values are reported as standard deviation.

‡Helicity in SDS micelles measured by MRE at 222 nm. Significant variations in helicity are observed among the Ser-Leu peptides. LSL and SL<sub>scr1</sub>, SL<sub>scr2</sub> are significantly less helical than the Leu-block peptides (with the exception S1L9) and SL<sub>amp</sub> ( $p < 0.05$ ). SL<sub>amp</sub> is significantly more helical than all peptides except for S9L9, S5L9 and S3L9 ( $p < 0.05$ ). Among the Leu-block peptides, S1L9 is significant less helical than S9L9, S5L9, and S3L9 ( $p < 0.05$ ). Significant differences also exist between S0L9 and S3L9; S2L9 and S3L9 ( $p < 0.05$ ). Error values are reported as standard deviation.

| Peptide              | % Gel-shift*<br>(SDS-PAGE) | Trp Blue shift†<br>(nm) | MRE x 10 <sup>3</sup> (deg cm <sup>2</sup> dmol <sup>-1</sup> )‡<br>at 222 nm |
|----------------------|----------------------------|-------------------------|-------------------------------------------------------------------------------|
| <b>Non-Leu-block</b> |                            |                         |                                                                               |
| SL <sub>n</sub>      | N/A                        | N/A                     | N/A                                                                           |
| LSL                  | N/A                        | N/A                     | -5.1 ± 0.8                                                                    |
| SL <sub>scr1</sub>   | 27.3 ± 3.0                 | 28 ± 0.0                | -6.2 ± 1.2                                                                    |
| SL <sub>scr2</sub>   | 30.0 ± 3.5                 | 24 ± 1.0                | -5.4 ± 1.4                                                                    |
| SL <sub>amp</sub>    | 42.2 ± 2.5                 | 24 ± 1.9                | -12.6 ± 1.2                                                                   |
| <b>Leu-block</b>     |                            |                         |                                                                               |
| S9L9                 | 86.0 ± 3.3                 | 22 ± 0.0                | -11.3 ± 1.5                                                                   |
| S5L9                 | 74.2 ± 7.2                 | 20 ± 0.0                | -11.1 ± 0.0                                                                   |
| S3L9                 | 111.7 ± 6.9                | 15 ± 1.1                | -12.4 ± 0.6                                                                   |
| S2L9                 | 99.6 ± 5.6                 | 29 ± 1.0                | -9.4 ± 0.6                                                                    |
| S1L9                 | 91.3 ± 5.5                 | 29 ± 1.1                | -7.8 ± 1.4                                                                    |
| S0L9                 | 88.3 ± 5.6                 | 24 ± 0.0                | -8.8 ± 1.2                                                                    |

**Table S2: Ser-Leu peptide helicity and blue shift in POPC liposomes**

\*Helicity in POPC liposomes measured by MRE at 222 nm. S9L9 is significantly less helical than the other Ser-Leu peptides ( $p < 0.01$ ). Values represent the average of at least 3 independent experiments. Error values are recorded as standard deviation.

†Tryptophan blue shifts were obtained from subtracting the maximum emission peak in POPC liposomes from the emission of free Trp in aqueous solution (350 nm). SL<sub>amp</sub> has a significantly smaller blue shift than the Leu-block peptides with the exception of S9L9 ( $p < 0.001$ ). Significant variations in blue shift were found between Leu-block peptides. S9L9 has the smallest blue shift of the Leu-block peptides ( $p < 0.05$ ). S5L9 has a significantly larger blue shift than S1L9 and S2L9 ( $p < 0.05$ ) and S3L9 has a significantly larger blue shift than S1L9 ( $p < 0.01$ ). Values represent the average of at least 3 independent experiments. Error values are reported as standard deviation.

| Peptide           | MRE x 10 <sup>3</sup> (deg cm <sup>2</sup> dmol <sup>-1</sup> )*<br>at 222 nm | Blue Shift†<br>(nm) |
|-------------------|-------------------------------------------------------------------------------|---------------------|
| Non-Leu-block     |                                                                               |                     |
| SL <sub>amp</sub> | -10.2 ± 1.1                                                                   | 18 ± 0.0            |
| Leu-block         |                                                                               |                     |
| S9L9              | -7.4 ± 0.4                                                                    | 27 ± 0.6            |
| S5L9              | -10.6 ± 0.6                                                                   | 29 ± 0.6            |
| S3L9              | -11.6 ± 0.5                                                                   | 28 ± 0.0            |
| S2L9              | -10.2 ± 0.7                                                                   | 26 ± 0.6            |
| S1L9              | -11.8 ± 0.5                                                                   | 25 ± 1.0            |
| S0L9              | -11.8 ± 0.6                                                                   | 22 ± 0.0            |

**Figure S1. Ser-Leu peptide helicities in HPLC solvents.** CD spectra of Ser-Leu peptides in HPLC solvents (60% solvent A, 40% solvent B). *A)* Non-Leu-block peptides. *B)* Leu-block peptides. Ser-Leu peptides exhibit similar helicity with the exception of LSL and SL<sub>scr1</sub> which are notably less helical. Spectra shown are an average of at least 2 independent experiments.

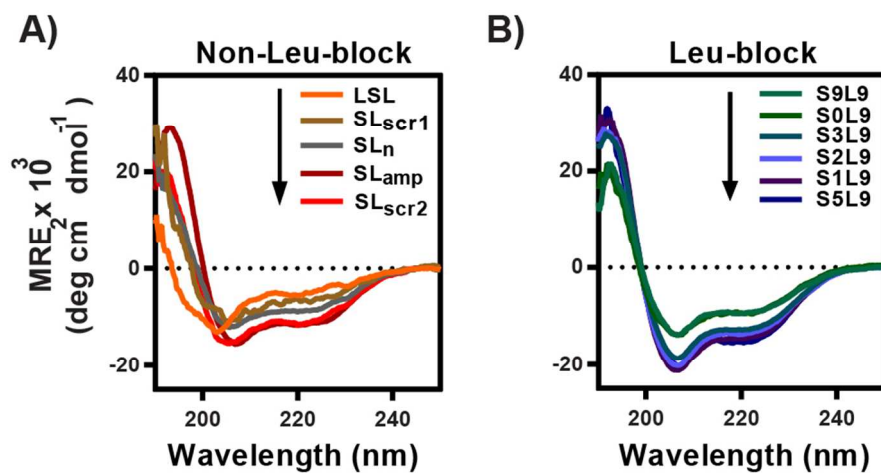

Supplement: Supplementary file 1 [file 3697843]
